# Supplementary material for: Ultra-light nanocomposite aerogels of bacterial cellulose and reduced graphene oxide for specific absorption and separation of organic liquids
Source: Royal Society of Chemistry journal article supplement (doi:10.1039/c4ra02168a), 2014-01-01
Supplement: c4ra02168a9.pdf [file c4ra02168a9.pdf]

## **Ultra-light nanocomposite aerogels of bacterial cellulose and reduced graphene oxide for specific absorption and separation of organic liquids**

Yonggui Wang,<sup>a,1</sup> Sandeep Yadav,<sup>b,1</sup> Thorsten Heinlein,<sup>b</sup> Valentino Konjik,<sup>a</sup> Hergen Breitzke,<sup>c</sup> Gerd Buntkowsky,<sup>c</sup> Jörg J. Schneider,<sup>b,\*</sup> Kai Zhang<sup>a,\*</sup>

<sup>a</sup> Ernst-Berl-Institute for Chemical Engineering and Macromolecular Science, Technische Universität Darmstadt, Alarich-Weiss-Straße 8, D-64287 Darmstadt, Germany

<sup>b</sup> Inorganic Chemistry, Eduard-Zintl-Institute for Inorganic Chemistry and Physical Chemistry, Technische Universität Darmstadt, Alarich-Weiss-Straße 12, D-64287 Darmstadt, Germany

<sup>c</sup> Physical Chemistry, Eduard-Zintl-Institute for Inorganic Chemistry and Physical Chemistry, Technische Universität Darmstadt, Alarich-Weiss-Straße 4, D-64287 Darmstadt, Germany

\* Corresponding author.

E-mail: zhang@cellulose.tu-darmstadt.de; joerg.schneider@ac.chemie.tu-darmstadt.de

### **Supplementary movies:**

Movie S1. Surface absorption by BC aerogel

Movie S2. Absorption by BC aerogel with delayed addition of cyclohexane

Movie S3. Absorption by BC+GO aerogel (50+50) with delayed addition of cyclohexane

Movie S4. Absorption by BC+rGO aerogel (80+20) with delayed addition of cyclohexane

Movie S5. Separation experiment of water and cyclohexane on BC aerogel

Movie S6. Separation experiment of water and cyclohexane on BC+GO aerogel (50+50)

Movie S7. Separation experiment of water and cyclohexane on BC+rGO aerogel (80+20)

## **Experimental section**

### **Materials**

*Gluconacetobacter xylinus* of the strain DSM 46605 was obtained from Leibniz Institute DSMZ-German Collection of Microorganisms and Cell Cultures (Braunschweig, Germany). Grapheme flakes of 325 mesh (99.8%) was purchased from Alfa Aesar (Karlsruhe, Germany). Deionized water (DI water) was used in all experiments. The other chemicals are all of analytical grade and used as received.

### **Biosynthesis of bacterial cellulose**

Bacterial cellulose (BC) was biosynthesized using *G. xylinus* culture in Hestrin-Schramm medium.<sup>1</sup> Briefly, 20.0 g glucose, 5.0 g yeast extract, 5.0 g bacterial peptone, 2.7 g sodium phosphate dibasic ( $\text{Na}_2\text{HPO}_4 \cdot 2\text{H}_2\text{O}$ ), 1.2 g citric acid and 5.7 g magnesium sulfate ( $\text{MgSO}_4$ ) were dissolved in 1 l DI water. Then, the pH value of the solution was adjusted to around 5 using 3 N HCl aqueous solution. Then, the growth medium was divided into 10 equal volumes of 100 ml each in a 250 ml flask. After that, the initial strain solution was added into the growth medium and the solutions were incubated at 30°C for 7 days. Obtained BC pellicles were purified three times in 0.1 N aqueous NaOH solution at 80°C, once in 0.1 N aqueous citric acid at 80°C and then washed with DI water until neutral pH. Finally, BC was freeze-dried at -50°C under a vacuum of 0.1 mbar.

### **Synthesis of GO**

Graphene oxide was prepared as described.<sup>2</sup> Briefly, 3 g graphene flakes and 18 g  $\text{KMnO}_4$  suspended in 9:1 mixture of 360 ml  $\text{H}_2\text{SO}_4$  (98%) and 40 ml  $\text{H}_3\text{PO}_4$  (85%) were treated at 50°C for 18 h. After cooling down, the slightly lilac suspension was poured into 600 ml ice containing 3 ml  $\text{H}_2\text{O}_2$  (30%). After standing at RT for 12 h, the solid was separated via centrifugation. The precipitate was purified using 140 ml water, 140 ml aqueous HCl solution (36%), and twice with 140 ml ethanol (99%). Finally, obtained graphene oxide (GO) was suspended in 100 ml water and treated with ultrasonication for 1 h before further use.

### **Nanocomposite aerogels of BC, BC/graphene oxide (BC/GO) and BC/reduced graphene oxide (BC/rGO)**

Dry BC was immersed in water at a given concentration and the suspension was stirred for 2 days. The swollen BC was chopped firstly with a blender and then Ultra-Turrax T25 (IKA®-Werke GmbH & Co. KG, Staufen, Germany) at 18000 rpm for 30 minutes, leading to an

aqueous suspension of nanofibrillated BC. Then, the BC suspension was degased via 5 min ultrasonication, frozen at -65°C, and freeze-dried at -50°C under vacuum. For the preparation of BC/GO aerogels, 100 ml of BC suspension (1.7 g/l) was mixed with defined volume of GO suspension at 10 g/l, so that the final weight ratio of both lay at 50:50 and 80:20. Then, the suspensions were mixed at RT for 3 h, degased via 5 min ultrasonication, frozen at at -65°C, and freeze-dried at -50°C under vacuum. In order to prepare BC/rGO aerogels, obtained BC/GO aerogels were reduced in a HORST oven (Horst GmbH, Lorsch, Germany) at 200 °C for 4 h under a hydrogen gas stream of 200 cm<sup>3</sup>/min.

## **Methods**

### **NMR**

Solid-state CP/MAS <sup>13</sup>C NMR spectroscopy was performed on a Bruker Avance II+ 400 WB spectrometer (Bruker Biospin, Ettlingen, Germany) at room temperature (RT) with a <sup>13</sup>C frequency of 400 MHz, 10 kHz spinning speed, 5 ms contact time and <sup>1</sup>H decoupling of 20 tppm.

### **Scanning Electron Microscopy (SEM)**

For SEM on a Philips XL30 FEG high-resolution scanning electron microscope (HR-SEM) (FEI Deutschland GmbH, Frankfurt/Main, Germany) operating at 2 kV, purified and dried BC samples were coated with thin palladium/platinum film.

### **Transmission Electron Microscopy (TEM)**

TEM was measured on a Philips CM20 transmission electron microscope (FEI) with LaB6-Kathode operating at 200 kV.

### **Liquid Absorbency and Porosity**

The liquid absorbency of the aerogel for organic liquids including DMF and cyclohexane were measured. Aerogels after weighting were put into a 25-mL flask containing 20 mL of organic liquid and allowed to absorb to saturate at room temperature. Then, the saturated aerogels were removed to a filter and their weights were measured until no liquid flowed down.

The absorbency (g/g) was calculated as:

$$Absorbency = \frac{(m_e - m_o)}{m_o} \quad (1), \text{ where } m_o \text{ and } m_e \text{ are the weights of saturated and}$$

dry aerogels, respectively. The absorbency was measured twice for each aerogel and the average value of the measurement was shown.

The porosity of each aerogel was calculated as:

$$Porosity(\%) = \left(1 - \frac{\rho_a}{[w \cdot \rho_c + (1-w) \cdot \rho_g]}\right) \times 100\% \quad (2), \text{ where } \rho_a \text{ is the density of the}$$

aerogel,  $\rho_c$  is the density of cellulose (taken as  $1.6 \text{ g/cm}^3$ );<sup>3</sup>  $\rho_g$  is the density of GO (measured as  $0.9127 \text{ g/cm}^3$ ); w is the proportion of cellulose in the mixture of BC/GO (w/w).

The porosity was measured twice for each aerogel and the average value was shown.

### Raman Spectroscopy

Raman spectra were recorded on Horiba LabRam HR 800 micro Raman spectrometer (Horiba Jobin Yvon, Bensheim, Germany) equipped with an air-cooled Argon ion laser (emission line  $\lambda = 514.5 \text{ nm}$ ).

The Raman spectrum of GO showed characteristic signals at  $1352 \text{ cm}^{-1}$  and  $1574 \text{ cm}^{-1}$  ascribed to D bands ( $A_{1g}$  symmetry mode) and G bands ( $E_{2g}$  mode of the  $sp^2$  carbon atoms), respectively.<sup>4</sup> After the reduction, the intensity of D/G bands for rGO increased significantly, indicating the increase of  $sp^2$  domain and thus successful reduction of GO.

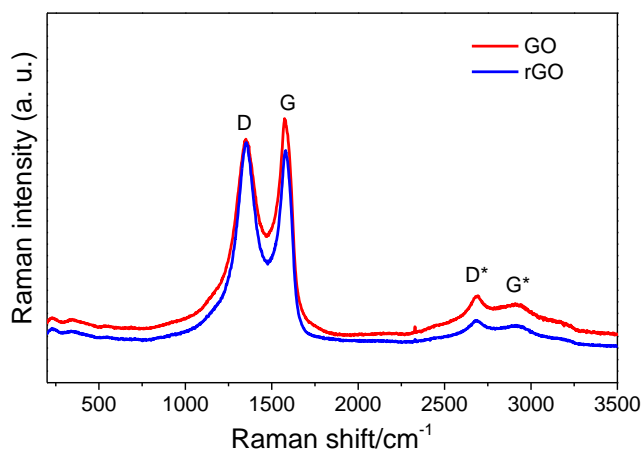

**Figure S1.** Raman spectra of GO and rGO.

### FTIR Spectroscopy

FTIR spectroscopy was conducted on Spectrum One FTIR Spectrometer (PerkinElmer, Massachusetts, USA) at room temperature (RT) between  $4000 \text{ and } 600 \text{ cm}^{-1}$  with a resolution of  $4 \text{ cm}^{-1}$ . Scans of 32 were accumulated. The spectra were baseline-corrected with 20

iterations and 200 statistical baseline points using OPUS Ver. 6.5 (Bruker Optics, Ettlingen, Germany).

Based on FTIR spectrum of BC/rGO after different reduction times, it is obvious that the maximal was reached after 4 h reduction.

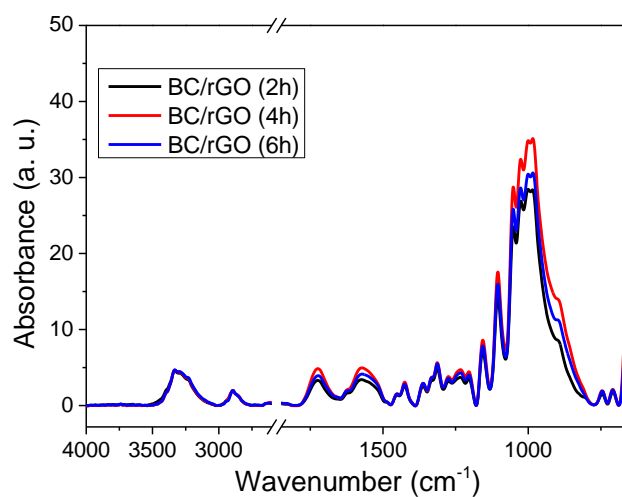

**Figure S2.** FT IR spectrum of BC/rGO after the reduction for 2, 4, and 6 h.

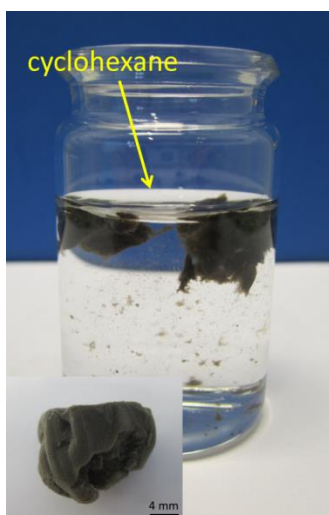

**Figure S3.** GO aerogel and GO aerogel in cyclohexane. Scale bar: 4 mm.

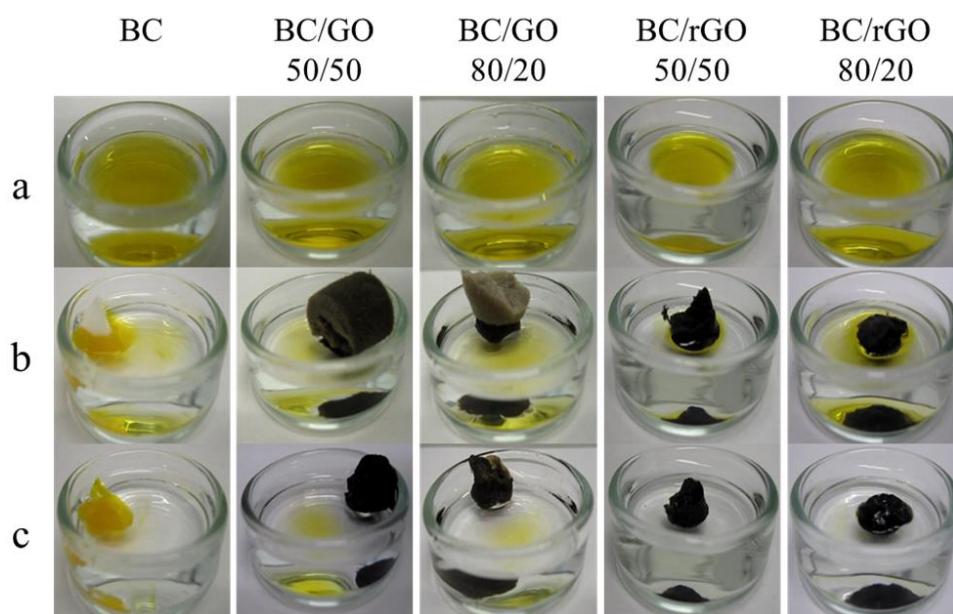

**Figure S4.** Representative images showing the absorption of cyclohexane (dyed with Sudan I) from water surface with a: dyed cyclohexane on water surface in petri dishes; b: placement of aerogel onto the surface of the mixture and begin of the absorption; c: end of the absorption.

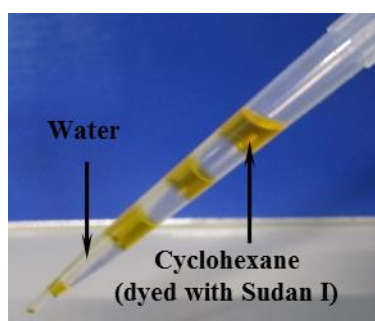

**Figure S5.** Representative image of added mixture of water and cyclohexane (dyed with Sudan I) for the separation experiment.

1. S. Hestrin and M. Schramm, *Biochem. J.*, 1954, **58**, 345-352.
2. D. C. Marcano, D. V. Kosynkin, J. M. Berlin, A. Sinitskii, Z. Sun, A. Slesarev, L. B. Alemany, W. Lu and J. M. Tour, *ACS Nano*, 2010, **4**, 4806-4814.
3. W. G. Glasser, in *Glycoscience*, eds. B. Fraser-Reid, K. Tatsuta and J. Thiem, Springer-Verlag, Berlin Heidelberg, 2008, ch. 6.3, pp. 1473-1512.
4. M. Chen, C. Zhang, X. Li, L. Zhang, Y. Ma, L. Zhang, X. Xu, F. Xia, W. Wang and J. Gao, *J. Mater. Chem. A*, 2013, **1**, 2869-2877.
